# Supplementary material for: Sexual Dimorphism and Aging in the Human Hyppocampus: Identification, Validation, and Impact of Differentially Expressed Genes by Factorial Microarray and Network Analysis
Source: PubMed Central journal article supplement (PMC5050216; doi:10.3389/fnagi.2016.00229), 2016-10-05
Supplement: Image1.pdf [file Image1.pdf]

## Supplementary Materials

### Sexual dimorphism and ageing in the human hippocampus: Identification, validation and impact of differentially expressed genes by factorial microarray and network analysis

Daniel V. Guebel<sup>1,2</sup> and Néstor V. Torres<sup>2\*</sup>

<sup>(1)</sup>Biotechnology Counselling Services. Buenos Aires. Argentina

<sup>(2)</sup>Systems Biology and Mathematical Modelling Group. Departamento de Bioquímica, Microbiología, Biología Celular y Genética. Facultad de Ciencias. Universidad de La Laguna. San Cristóbal de La Laguna. Tenerife. España.

e-mail (DVG): [dvguebel@hotmail.com](mailto:dvguebel@hotmail.com)

\*e-mail (NVT): [ntorres@ull.edu.es](mailto:ntorres@ull.edu.es)

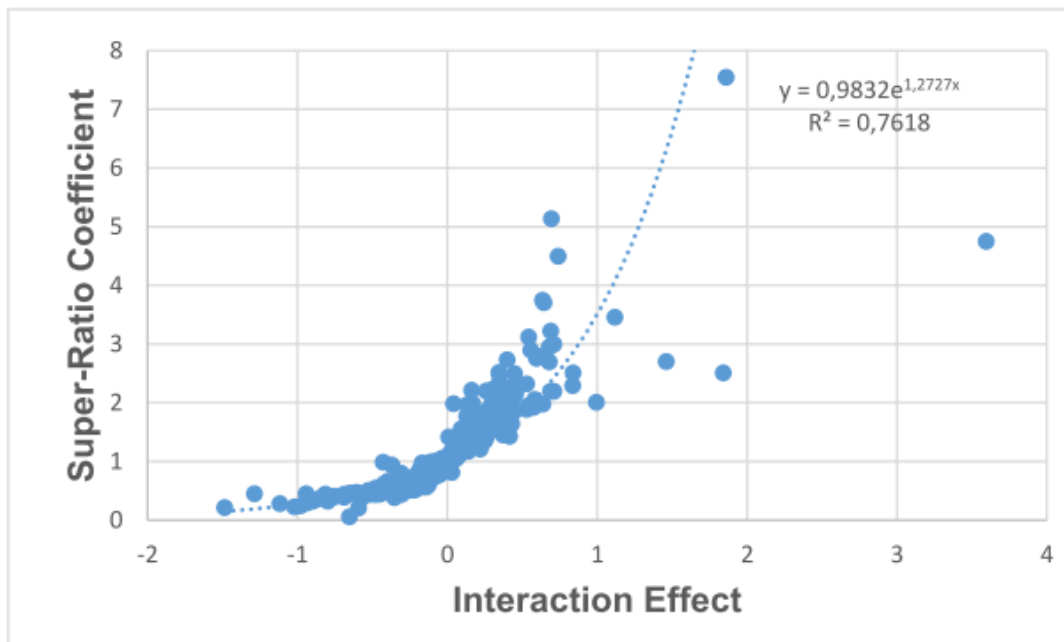

**Figure 1S.** Correlation between the magnitude of the interaction effect and the super-ratio coefficient (n=2000 probes)
