# Supplementary material for: Sexual Dimorphism and Aging in the Human Hyppocampus: Identification, Validation, and Impact of Differentially Expressed Genes by Factorial Microarray and Network Analysis
Source: PubMed Central journal article supplement (PMC5050216; doi:10.3389/fnagi.2016.00229), 2016-10-05
Supplement: Table4.pdf [file Table4.pdf]

## Supplementary Materials

### Sexual dimorphism and ageing in the human hippocampus: Identification, validation and impact of differentially expressed genes by factorial microarray and network analysis

Daniel V. Guebel<sup>1,2</sup> and Néstor V. Torres<sup>2\*</sup>

<sup>(1)</sup>Biotechnology Counselling Services. Buenos Aires. Argentina

<sup>(2)</sup>Systems Biology and Mathematical Modelling Group. Departamento de Bioquímica, Microbiología, Biología Celular y Genética. Facultad de Ciencias. Universidad de La Laguna. San Cristóbal de La Laguna. Tenerife. España.

e-mail (DVG): [dvguebel@hotmail.com](mailto:dvguebel@hotmail.com)

\*e-mail (NVT): [ntorres@ull.edu.es](mailto:ntorres@ull.edu.es)

**Table S4: Main metabolic functional classes prevailing by the Age Ratio# discriminating criterion.** Functionalities are derived by ontology analysis of the compatible metabolic networks built from nucleus 1, derived from the whole list of age-dependent genes (for details see the Supplementary Table S5).

| Ontology Process (metabolic)                                          | Set of genes with Age Ratio# < 1 | Set of genes with Age Ratio# > 1 |
|-----------------------------------------------------------------------|----------------------------------|----------------------------------|
|                                                                       | Hypergeometric Probability*      | Hypergeometric Probability*      |
| Hexoses metabolism, Glycolysis                                        | $1.8 \times 10^{-6}$             | $4 \times 10^{-2}$               |
| Mitochondrial matrix, aerobic respiration, respiratory electron chain | $7.0 \times 10^{-3}$             | $1.5 \times 10^{-4}$             |
| Glycerolipids, Lipid biosynthesis                                     | $8.4 \times 10^{-7}$             | NDAS                             |
| Dicarboxylic Acid transport                                           | $6.0 \times 10^{-7}$             | $4.5 \times 10^{-9}$             |
| Monocarboxylic Acid transport and metabolism                          | $1.8 \times 10^{-6}$             | $3.7 \times 10^{-5}$             |
| Glutamine and glutamate transport                                     | NDAS                             | $6.3 \times 10^{-7}$             |
| Serine, branched amino-acids, and proline transport;                  | $3.0 \times 10^{-7}$             | NDAS                             |
| Thyroid hormone transport                                             | $1.5 \times 10^{-6}$             | NDAS                             |
| Heme /Iron-binding                                                    | $2.8 \times 10^{-6}$             | $3.1 \times 10^{-5}$             |
| Golgi cisterna membrane and Golgi stacking. Microsome                 | $3.0 \times 10^{-5}$             | $2.6 \times 10^{-4}$             |
| Glycosyl-transferase activity in Golgi                                | $2.0 \times 10^{-5}$             | $4.2 \times 10^{-5}$             |
| Pre-assembly GPI-anchored in ER membrane                              | $6.0 \times 10^{-7}$             | $5.1 \times 10^{-6}$             |
| Xenobiotic response                                                   | $6.4 \times 10^{-8}$             | $4.4 \times 10^{-12}$            |
| Nucleosides biosynthesis and nucleotide salvage                       | $7.8 \times 10^{-7}$             | $3.7 \times 10^{-7}$             |
| 3',5'-cyclic -AMP phosphodiesterase activity                          | $5.4 \times 10^{-7}$             | $4.3 \times 10^{-6}$             |
| Aromatase activity                                                    | $6.8 \times 10^{-4}$             | $5.2 \times 10^{-7}$             |
| Calcium homeostasis                                                   | $5.9 \times 10^{-2}$             | $2.7 \times 10^{-5}$             |

\* The hypergeometric probabilities are values corrected for the multi-comparisons. In addition, the values indicated are the averages of the probabilities along the several ontology categories that make up each subgroup defined, but weighed according to the relative frequency of the initial ontology classes that resulted from the analysis; \*\* NDAS: no-detected as significant
