# Supplementary material for: Sexual Dimorphism and Aging in the Human Hyppocampus: Identification, Validation, and Impact of Differentially Expressed Genes by Factorial Microarray and Network Analysis
Source: PubMed Central journal article supplement (PMC5050216; doi:10.3389/fnagi.2016.00229), 2016-10-05
Supplement: Table7.pdf [file Table7.pdf]

## Supplementary Materials

### Sexual dimorphism and ageing in the human hippocampus: Identification, validation and impact of differentially expressed genes by factorial microarray and network analysis

Daniel V. Guebel<sup>1,2</sup> and Néstor V. Torres<sup>2\*</sup>

<sup>(1)</sup>Biotechnology Counselling Services. Buenos Aires. Argentina

<sup>(2)</sup>Systems Biology and Mathematical Modelling Group. Departamento de Bioquímica, Microbiología, Biología Celular y Genética. Facultad de Ciencias. Universidad de La Laguna. San Cristóbal de La Laguna. Tenerife. España.

e-mail (DVG): [dvguebel@hotmail.com](mailto:dvguebel@hotmail.com)

\*e-mail (NVT): [ntorres@ull.edu.es](mailto:ntorres@ull.edu.es)

**Table S7: Differential functional classes associated to metabolism for the set of sex-dependent genes.** Functionalities are derived by ontology analysis performed on the whole compatible network (for details see the Supplementary Table S8).

| Ontology process (Metabolic)                | genes with Sex Ratio# <1   | genes with Sex Ratio# >1   |
|---------------------------------------------|----------------------------|----------------------------|
|                                             | Hypergeometric probability | Hypergeometric probability |
| Xenobiotic response, drug response          | 3.2 x 10 <sup>-8</sup>     | 4.4 x 10 <sup>-6</sup>     |
| Adenylate cyclase                           | 8.0 x 10 <sup>-6</sup>     | 7.8 x 10 <sup>-4</sup>     |
| 3',5'-cyclic nucleotide phosphodiesterase   | 1.1 x 10 <sup>-5</sup>     | 3.2 x 10 <sup>-5</sup>     |
| c-GMP catabolism                            | 6.6 x 10 <sup>-7</sup>     | 8.0 x 10 <sup>-4</sup>     |
| Carboxylic Acid Transport                   | 1.0 x 10 <sup>-7</sup>     | 8.7 x 10 <sup>-3</sup>     |
| Gluconeogenesis, glucose biosynthesis       | 3.3 x 10 <sup>-6</sup>     | 6.3 x 10 <sup>-3</sup>     |
| Tricarboxylic acid cycle (TCA), respiration | 1.2 x 10 <sup>-6</sup>     | 8.7 x 10 <sup>-3</sup>     |
| Amino acid biosynthesis                     | 1.3 x 10 <sup>-1</sup>     | 8.0 x 10 <sup>-5</sup>     |
| Amino acid catabolism                       | 5.9 x 10 <sup>-2</sup>     | 2.6 x 10 <sup>-4</sup>     |
| Glycero-phospholipids                       | 1.3 x 10 <sup>-2</sup>     | 3.6 x 10 <sup>-4</sup>     |
| Phospho-Inositosides metabolism             | 1.2 x 10 <sup>-1</sup>     | 1.3 x 10 <sup>-4</sup>     |
| One-Carbon metabolism                       | 1.5 x 10 <sup>-4</sup>     | 4.1 x 10 <sup>-4</sup>     |
| Glutathione metabolic processes             | 8.2 x 10 <sup>-4</sup>     | 5.8 x 10 <sup>-4</sup>     |
| Steroid response                            | 1.3 x 10 <sup>-2</sup>     | 4.8 x 10 <sup>-4</sup>     |
| Aromatase activity                          | 7.2 x 10 <sup>-3</sup>     | 3.2 x 10 <sup>-5</sup>     |
| Response to nitrosative compounds           | 5.8 x 10 <sup>-7</sup>     | 1.6 x 10 <sup>-5</sup>     |
| Superoxide, hydrogen peroxide               | 6.2 x 10 <sup>-3</sup>     | 1.1 x 10 <sup>-2</sup>     |
| Nitric Oxide generation and regulation      | NDAS**                     | 4.2 x 10 <sup>-4</sup>     |
| Caffein oxidase                             | 5.8 x 10 <sup>-7</sup>     | 6.2 x 10 <sup>-8</sup>     |
| Endoplasmic reticulum membrane protein      | NDAS                       | 2.8 x 10 <sup>-4</sup>     |
| Glycosylation of proteins                   | NDAS                       | 1.3 x 10 <sup>-5</sup>     |
| Golgi membrane proteins                     | 1.7 x 10 <sup>-1</sup>     | 8.7 x 10 <sup>-5</sup>     |
| Lysosome proteins                           | 1.3 x 10 <sup>-3</sup>     | 3.4 x 10 <sup>-4</sup>     |

\* The hypergeometric probabilities are values corrected for the multi-comparisons. In addition, the values indicated are the averages of the probabilities along the several ontology categories that make up each subgroup defined, but weighed according to the relative frequency of the initial ontology classes that resulted from the analysis; \*\* NDAS: no-detected as significant.
