# Supplementary material for: Sexual Dimorphism and Aging in the Human Hyppocampus: Identification, Validation, and Impact of Differentially Expressed Genes by Factorial Microarray and Network Analysis
Source: PubMed Central journal article supplement (PMC5050216; doi:10.3389/fnagi.2016.00229), 2016-10-05
Supplement: Table9.pdf [file Table9.pdf]

## Supplementary Materials

Sexual dimorphism and ageing in the human hippocampus: Identification, validation and impact of differentially expressed genes by factorial microarray and network analysis

Daniel V. Guebel<sup>1,2</sup> and Néstor V. Torres<sup>2\*</sup>

<sup>(1)</sup>Biotechnology Counselling Services. Buenos Aires. Argentina

<sup>(2)</sup>Systems Biology and Mathematical Modelling Group. Departamento de Bioquímica, Microbiología, Biología Celular y Genética. Facultad de Ciencias. Universidad de La Laguna. San Cristóbal de La Laguna. Tenerife. España.

e-mail (DVG): [dvguebel@hotmail.com](mailto:dvguebel@hotmail.com)

\*e-mail (NVT): [ntorres@ull.edu.es](mailto:ntorres@ull.edu.es)

**Table S9:** Comparison between proteins altered during ageing as detected by proteome analysis (Xu et al., 2016) with respect to our results using factorial Q-GDEMAR (micro-array data from Berchtold et al., 2008). In both the samples were taken from the hippocampus region, but in the proteomic study the samples come from a chinese population, whereas in the case of micro-array the samples come from a caucasian population.

| Proteome Analysis<br>[Elderred] | Microarray analysed by factorial Q-GDEMAR                 |                                      |                                                          |
|---------------------------------|-----------------------------------------------------------|--------------------------------------|----------------------------------------------------------|
|                                 | Age Effect<br>[Elderred to Adult Ratio]                   | Sex Effect<br>[Female to Male Ratio] | Sex-Age Interaction<br>[Super-Ratio]                     |
| HPCA                            |                                                           |                                      | HPCA: +2.14                                              |
| BGN                             | BGN: +1.20                                                | BGN: -1.43                           |                                                          |
| TPM1                            | TMP4: -1.60                                               |                                      | TPM2: +1.73<br>TPM3: +1.92                               |
| MYH11                           | MYH2: +1.93<br>MYH3: -1.37<br>MYH8: +1.19<br>MYH10: +1.41 |                                      | MYH11: +2.04<br>MYH10: +1.20                             |
| GSTM4                           | GSTM5: +1.24                                              | GSTM3 +1.30                          |                                                          |
| CAPS2                           |                                                           |                                      | CAPS2: +1.71<br>CAPS2: -2.19                             |
| SYNPO2                          | SYNPO2: +1.57<br>SYNPO: -1.68                             | SYNPO: -1.37                         |                                                          |
| VIM                             |                                                           |                                      |                                                          |
| PMP2                            |                                                           |                                      | PMP2: +1.87                                              |
| TAGLN                           | TAGLN: -1.80                                              | TAGLN: -1.55                         |                                                          |
| FHL2                            | FHL1: +2.04<br>FHL3: +1.36<br>FHL5: +1.26                 |                                      | FHL1: +3.18<br>FHL1: -1.64                               |
| CAS                             |                                                           |                                      | CASR: +2.03                                              |
| FTL                             |                                                           |                                      |                                                          |
| RIMS3                           |                                                           |                                      | RIMS4: +1.26                                             |
| TF (transferrine)               |                                                           |                                      | TF: +1.19<br>TFR2: +1.47                                 |
| BDH2                            |                                                           |                                      | HIBADH: +9.84                                            |
| CTSH                            | CTSB: -1.45<br>CTSC: -1.52<br>CTSF: -1.37                 |                                      | CTSS: +1.96<br>CTSB: +1.89<br>CTSG: +1.59<br>CTSL: -2.28 |

|              |                                                                                                                 |                                                                                               |                                                                                                                                  |
|--------------|-----------------------------------------------------------------------------------------------------------------|-----------------------------------------------------------------------------------------------|----------------------------------------------------------------------------------------------------------------------------------|
| GPRC5B       |                                                                                                                 | GPRC5B: +1.18                                                                                 |                                                                                                                                  |
| COL6A2       | COL6A2: -1.50                                                                                                   |                                                                                               | COL6A5: +1.46                                                                                                                    |
| COL6A3       | COL6A1: +1.24                                                                                                   | COL6A1: +1.35                                                                                 | COL6A1:+1.55                                                                                                                     |
| HLA-Class I  | HLA-C: -1.55                                                                                                    |                                                                                               | HLA_A2: +2.11<br>HLA-B: +1.44<br>HLA-E: -1.68<br>HLA-G:+1.41<br>HLA_A2: +2.11                                                    |
| HLA-Class II | HLA-DPA2: +1.47<br>HLA-DQA1: -1.33<br>HLA-DQA2: -1.33<br>HLA-DRB4: +1.24<br>HLD-DRB5: +1.29                     | HLA-DRA:-1.26                                                                                 | HLA-DRB1: +1.24<br>HLA-DRB2: +1.14<br>HLA-DRB6: -2.55<br>HLA-DPA1: -3.57<br>HLA-DQA1: -1.41<br>HLA-DQB1: +2.18<br>HLA-DOA: +1.56 |
| RENBP??      |                                                                                                                 |                                                                                               |                                                                                                                                  |
| H2AFY        | H2FY: -1.38<br>H2APY2: -1.40<br>H2AFX: -1.88                                                                    |                                                                                               | H2AFY: -1.958                                                                                                                    |
| ITPKB        | ITPKA: -1.32                                                                                                    | ITPKB: 1.27                                                                                   | ITPKB: +1.89<br>ITPKB: -1.23                                                                                                     |
| FLNA         | FLNC: +1.38                                                                                                     |                                                                                               | FLNB: +1.68<br>FBLIM1: -1.60                                                                                                     |
| GFAP         |                                                                                                                 |                                                                                               |                                                                                                                                  |
| ANXA2        |                                                                                                                 | ANXA2: -1.65                                                                                  | ANXA2: +1.54<br>ANXA2: +1.62<br>ANXA2: -2.31                                                                                     |
| NUDTIC       | NUDT2: +1.22<br>NUDT4: +1.24<br>NUDT12: +1.59<br>NUDT13: +1.20<br>NUDT22: +1.43<br>NUDC: 1.19<br>NUDT16R1: 1.19 | NUDT2:-1.36<br>NUDT3: -1.65<br>NUDT4: +1.37<br>NUDT10:-1.29<br>NUDT13: +1.21<br>NUDT22: -1.36 | NUDT4: +1.66<br>NUDT5: +1.68<br>NUDT9: +1.66<br>NUDT11: +1.70<br>NUDT17: +1.52<br>NUDT17: -1.54<br>NUDT19: +1.80<br>NUDT6: +2.55 |
| NES          |                                                                                                                 |                                                                                               |                                                                                                                                  |
| COG8         | COG1: +1.21<br>COG2: +1.23<br>COG5: +1.26<br>COG5: -1.33<br>COG6: -1.45                                         |                                                                                               | COG1: -1.70<br>COG2: -2.85                                                                                                       |
| S100A9       |                                                                                                                 |                                                                                               | S100A12: +1.61<br>S100A16: +1.20                                                                                                 |
| SCG2         | SCG3: +1.31                                                                                                     | SCG2: +1.23<br>SCG3: -1.31                                                                    | SCG5: +1.85                                                                                                                      |
| NRP1         | NRP1: -1.40<br>NRP2: -1.63                                                                                      | NRP1: -1.37<br>NRP2: +1.23                                                                    | NRP2: +1.234<br>NRP2: -2.011                                                                                                     |
| IGLC2        | IGL7: +1.37<br>IGLL5: +1.22<br>IGLC7: +1.36                                                                     |                                                                                               | IGLL1: -1.77<br>IGLV140/44: -1.84                                                                                                |

|                           |                                                                                                                 |                                                                                                |                                                                                               |
|---------------------------|-----------------------------------------------------------------------------------------------------------------|------------------------------------------------------------------------------------------------|-----------------------------------------------------------------------------------------------|
|                           | IGLV@: +1.24<br>IGLV1-40: +1.62                                                                                 |                                                                                                |                                                                                               |
| PCDHGC5                   | PCDHGC5: -1.50<br>PCDGC3: +1.44<br>PCDHA10: +1.20<br>PCDHGA8: -1.35<br>PCDH12: -1.76<br>PCDHGB7: -2.21          | PCDHBS5: +1.20<br>PCDH11X: -1.26<br>PCDHB10: -1.34<br>PCDH12: -1.38                            | PDCDH17: +3.75<br>PDCDH18: +1.68<br>PDCDHGA9: +1.64<br>PDCDH19: +1.51<br>PCDH7: -1.53 //-1.70 |
| FABP3                     | FABP5: +1.34                                                                                                    |                                                                                                | FABP7: -1.70                                                                                  |
| SERPINA1                  | SERPINA1: -2.02                                                                                                 | SERPINA1: -1.28                                                                                | SERPINA6: +2.90                                                                               |
| HSPB1                     |                                                                                                                 | HSPA8: +1.34<br>HSPA9: +1.19<br>HSPB9: +1.21<br>HSPD1: +1.26<br>HSP90A1: 1.26                  | HSPB7: +1.54<br>HSPB8: -2.64                                                                  |
| GPT                       |                                                                                                                 |                                                                                                | GPT: +2.03                                                                                    |
| CLIC6                     |                                                                                                                 |                                                                                                | CLIC2: -1.96                                                                                  |
| CACNG8                    | CACNG8: +1.22                                                                                                   | CACNG8: +1.23<br>CACNG2: +1.24                                                                 | CACNG1: +1.89<br>CACNGG3: -1.51                                                               |
| SMARCE1                   | SMARCA4: +1.20<br>SMARCA1: +1.18                                                                                |                                                                                                | SMARCA2: +1.80<br>SMARCA2: +1.35                                                              |
| KNG1                      | KNG1: +1.26                                                                                                     |                                                                                                | KNG1: +1.82                                                                                   |
| APOA2                     | APOB: 1.34<br>APOC2: -1.65<br>APOBEC3A: -1.46<br>(cytidine deaminase editing enzyme, antiviral)<br>APOOL: -1.70 | APOE: +1.19<br>APOOC: +1.19<br>APOC2: -1.30<br>APOBEC2: -1.60<br>(Editing enzyme of ApoE mRNA) | APOA2: +1.86                                                                                  |
| WIPF3                     | WIPF1: +1.46                                                                                                    |                                                                                                | WIPF2: +1.21                                                                                  |
| RAB3D                     | RAB3IP: -1.39<br>RAB33A: -1.45                                                                                  | RAB3B: +1.19<br>RAB36: +1.20<br>RAB39A: +1.29<br>RAB3IL1: +1.26<br>RAB3GAP1: -1.30             | RAB3C: -1.70<br>RAB30: +3.01<br>RAB37: +2.06                                                  |
| ALBUMIN                   |                                                                                                                 |                                                                                                | ALBUMIN: +2.55                                                                                |
| PVALB                     |                                                                                                                 |                                                                                                |                                                                                               |
| AHS6                      | AHS2: +1.19                                                                                                     |                                                                                                |                                                                                               |
| CRMP1                     |                                                                                                                 |                                                                                                |                                                                                               |
| VITAMIN D BINDING PROTEIN | VDR: +1.19<br>VDR: +1.18                                                                                        |                                                                                                |                                                                                               |
| IGHG1                     | IGHG1:<br>-1.35// -2.68// +1.66                                                                                 |                                                                                                | IGHG1:<br>1.72// 1.51// 1.45                                                                  |
| PVRL1                     |                                                                                                                 | PVRL1: -1.26                                                                                   | PVRL1: -3.45                                                                                  |
| SHISA6                    | SHISA3: +1.80<br>SHISA5: +1.21                                                                                  | SHISA3: +1.22<br>SHISA5: +1.32                                                                 | SHISA2: -1.51                                                                                 |
